# Supplementary material
Source: MDPI journal article supplement (https://www.mdpi.com/2673-4060/1/2/12)
Supplement: s1 [file s1]

Article

# Investigating the Climate-Induced Livelihood Vulnerability Index in Coastal Areas of Bangladesh

Mehedi Mudasser <sup>1</sup>, Md. Zakir Hossain <sup>2</sup>, Khan Rubayet Rahaman <sup>3,\*</sup> and Nur Mohammad Ha-Mim <sup>2</sup>

<sup>1</sup> National Resilience Programme (NRP), UNDP Bangladesh, IDB Bhaban, 18th Floor, UN Offices, E/8-A, Begum Rokeya Sarani, Dhaka 1207, Bangladesh; mehedi.mudasser@undp.org

<sup>2</sup> Urban and Rural Planning Discipline, Khulna University, Khulna 9208, Bangladesh; zakir@ku.ac.bd (M.Z.H.); nurhamimurp15@gmail.com (N.M.H.-M.)

<sup>3</sup> Department of Geography and Environmental Studies, St. Mary's University, 923 Robie Street, Halifax, NS, B3H 3C3, Canada

\* Correspondence: khan.rahaman@smu.ca

## Supplementary

**Table S1.** Land use/cover change between 2010 and 2008.

| Land use/cover           | Area (in acre) and Percentage |              |                 |                 | Change in Percentage<br>(2010-2008) |
|--------------------------|-------------------------------|--------------|-----------------|-----------------|-------------------------------------|
|                          | Area in 2008                  | Area in 2010 | Percent in 2008 | Percent in 2010 |                                     |
| Vegetation               | 6619.14                       | 4527.96      | 16.03           | 10.97           | -5.07                               |
| Agriculture              | 8755.02                       | 0.00         | 21.21           | 0.00            | -21.21                              |
| Gher and waterbodies     | 21773.36                      | 24676.73     | 52.74           | 59.77           | 7.03                                |
| Built up area            | 4138.77                       | 1179.58      | 10.02           | 2.86            | -7.17                               |
| Unused agricultural land | 0.00                          | 10902.02     | 0.00            | 26.41           | 26.41                               |
| Total                    | 41286.30                      | 41286.30     | 100.00          | 100.00          |                                     |

**Table S2.** Variable selection under major component for livelihood vulnerability index (LVI).

| Dimensions        | Major Components          | Sub-Components                                  | Explanation of sub-components                                                                                                            | Survey questions                                                                                                                  | Relationship                                                                                               |
|-------------------|---------------------------|-------------------------------------------------|------------------------------------------------------------------------------------------------------------------------------------------|-----------------------------------------------------------------------------------------------------------------------------------|------------------------------------------------------------------------------------------------------------|
|                   |                           |                                                 |                                                                                                                                          |                                                                                                                                   |                                                                                                            |
| Adaptive Capacity | Socio-Demographic Profile | Dependency [19,20]                              | the family member younger than 15 or older than 64 - to the working-age population - those ages 15–64                                    | Information collected from household questionnaire on age of each member.                                                         | Positive (Higher dependency increases vulnerability)                                                       |
|                   |                           | Education of the head of the household [37]     | The head of household report that he/she has attended zero years of formal schooling                                                     | Information collected from household questionnaire on the level of education of each member, including the head of the household. | Positive (More illiterate head of the household increase vulnerability)                                    |
|                   |                           | Female-headed household [19,38]                 | The primary adult is female. If a male head is away from the home >6 months per year the female is counted as the head of the household. | Information collected from household questionnaire on sex of HH                                                                   | Positive (Female HH increases vulnerability as rural coastal women cannot work or get facilities like men) |
|                   |                           | Single headed elderly family                    | HH with minimum 8 persons but has only one earning member                                                                                | Information collected from household questionnaire on household size and no. of earning members                                   | Positive (Single headed large family has less adaptive capacity and high vulnerability)                    |
|                   |                           | HH has female with no functional education [23] | None of the female HH member has minimum education level                                                                                 | Information collected from household                                                                                              | Positive (Such HH, lower the adaptive                                                                      |

|                       |                                                                                             |                                                                                                                                                                                        |                                                                                                                                                        |                                                                                                                            |
|-----------------------|---------------------------------------------------------------------------------------------|----------------------------------------------------------------------------------------------------------------------------------------------------------------------------------------|--------------------------------------------------------------------------------------------------------------------------------------------------------|----------------------------------------------------------------------------------------------------------------------------|
|                       |                                                                                             |                                                                                                                                                                                        | questionnaire on educational status)                                                                                                                   | capacity and higher the vulnerability)                                                                                     |
|                       | HH has girl child aged 10-19 years [23]                                                     | This age of girl child is generally more susceptible to abuse                                                                                                                          | Information collected from household questionnaire on age                                                                                              | Positive (Such HH has girls of this age has lower adaptive capacity and higher the vulnerability)                          |
|                       | Having debt [39]                                                                            | HH who have debt                                                                                                                                                                       | Have you any debt? How much?                                                                                                                           | Positive (High debt increases vulnerability)                                                                               |
|                       | Loan repayment from the income                                                              | Loan repayment by the HH from the income                                                                                                                                               | How do you repay the loan from your income? How much per month/year?                                                                                   | Positive (Higher loan repayment has lowered the adaptive capacity and increase vulnerability)                              |
|                       | Disability in the household                                                                 | Disable person of a HH                                                                                                                                                                 | Is there any disable person in your family? How many?                                                                                                  | Positive (More disable person lower the adaptive capacity)                                                                 |
| Livelihood Strategies | Family members working outside the community [40]                                           | Household reported at least one family member worked outside the community to earn a wage                                                                                              | Any member of your family goes to outside to earn? If yes, how much?                                                                                   | Negative (If the Number of members increase the family will be less vulnerable)                                            |
|                       | Average agricultural and non-agricultural livelihood diversification index (LDI) [19,23–25] | The inverse of (the total number of non-agri and agricultural livelihood activities + 1) viz. A HH that grow rice, raise cattle, do aquaculture will have a $LDI_a = 1/(3 + 1) = 0.25$ | What type of non-agriculture and agricultural activities performed by your household members after cyclone?                                            | Negative (Higher the LDI, higher the adaptive capacity, lower the vulnerabilities)                                         |
|                       | Household who has burden of loan [19,40]                                                    | Household who took a loan in the past 6 years                                                                                                                                          | Do you loan money from anywhere in the last 6 years? How much?                                                                                         | Positive (Loan increases the burden)                                                                                       |
|                       | Household changed sowing and cropping schedule [19,40]                                      | Household who changed sowing and cropping schedule                                                                                                                                     | Have any change occurred in schedule of sowing and cropping?                                                                                           | Negative (Change sowing and schedule reduce the vulnerability)                                                             |
|                       | Help receive: provide ratio [23]                                                            | Ratio of (the no. of types of help received by a HH last year +1) to (the no. of types of help given by a HH to someone else last year +1)                                             | How many times did you receive help from others HH, GOs and NGOs (e.g., Get medical care or medicines, sell animal products or other goods produced by | Negative (A measure of social bonding which helps HHs in crises and help build adaptive capacity and reduce vulnerability) |

|             |               |                                                                                                        |                                                                                                                          |                                                                                                                                                                                                                 |
|-------------|---------------|--------------------------------------------------------------------------------------------------------|--------------------------------------------------------------------------------------------------------------------------|-----------------------------------------------------------------------------------------------------------------------------------------------------------------------------------------------------------------|
| Sensitivity | Food Security |                                                                                                        |                                                                                                                          | family, Take care of children) last year?<br>How many times did you give help to someone else last year?                                                                                                        |
|             |               | Household that did not apply to their local government for assistance in the past 12 months [19,41–42] | HH did not receive any assistance from their local government in the past 12 months                                      | In the past 12 months, have you or someone in your family gone to your community leader for help?                                                                                                               |
|             |               | Members of Local Committee/ Samiti                                                                     | Membership of the HH members in local committee or Samiti                                                                | Do you or your family members have any membership in locally organized committee or microfinance cooperatives?                                                                                                  |
|             |               | Membership in the micro-credit organization                                                            | HH members have membership in the micro-credit organization                                                              | Do you have any membership in the micro-credit organization?                                                                                                                                                    |
|             |               | Access to micro-finance of NGOs                                                                        | Financial support obtained through micro-credit institutions, NGOs                                                       | Did you or your family members take financial support from NGOs through micro-credit programs last year?                                                                                                        |
|             |               | Struggle to find food [19,41–42]                                                                       | Average number of months households struggle to obtain food for their family                                             | Does your family have adequate food the whole year, or are there times during the year that your family does not have enough food?<br>How many months a year does your family have trouble getting enough food? |
|             |               | Household with primary irrigation source [43]                                                          | Household with primary irrigation source for agriculture (e.g. Electric TW, Diesel TW, Canal, Pumped from surface water) | What percentage can you use as irrigation source easily?                                                                                                                                                        |
|             |               |                                                                                                        |                                                                                                                          |                                                                                                                                                                                                                 |
|             |               |                                                                                                        |                                                                                                                          |                                                                                                                                                                                                                 |
|             |               |                                                                                                        |                                                                                                                          |                                                                                                                                                                                                                 |

|        |                                                                             |                                                                |                                                                                             |                                                                                                                     |
|--------|-----------------------------------------------------------------------------|----------------------------------------------------------------|---------------------------------------------------------------------------------------------|---------------------------------------------------------------------------------------------------------------------|
|        | Ability to save harvested crops to eat during a different time of year [19] | Household that do not save crops from each harvest             | Does your family save some of the crops you harvest to eat during a different time of year? | Negative (More save reduce vulnerability)                                                                           |
|        | Ability to save seeds to grow the next year [19,41–42]                      | Household that do not have seeds from year to year             | Does your family save seeds to grow the next year?                                          | Negative (More save reduce vulnerability)                                                                           |
|        | Access to free seeds and fertilizer                                         | Getting free seeds or fertilizer from anywhere since last year | Did your family get free seeds and fertilizer from any source?                              | Negative (Only seeds or fertilizer or nothing received HH is more sensitive to risk than those who get both or one) |
|        | Land Productivity [39]                                                      | Loss of land productivity after Aila                           | Have any change occurred in number of harvested crops?                                      | Positive (Loss of productivity will increase vulnerability)                                                         |
|        | Decreased quality of fresh water                                            | Self-Explanatory                                               | What do you think about the quality of drinking water? Safe, medium, or Unsafe?             | Positive (Decrease quality of water will increase vulnerability)                                                    |
|        | Distance to source of natural water [37]                                    | Self-Explanatory                                               | What is the distance (in km) of source of drinking water from your home?                    | Positive (Longer the distance, the higher is the vulnerability)                                                     |
|        | Whether experienced scarcity of water [37]                                  | Self-Explanatory                                               | Is the water supply from the source you use adequate?                                       | Negative (More adequate source of water supply reduces vulnerability)                                               |
|        | Whether the household spent money to get water [37]                         | Amount of money spent on getting water                         | Did you spend any money on drinking water in the last 12 months? If Yes, how much?          | Positive (Higher the amount of money spent on getting water, higher is the vulnerability)                           |
|        | Whether household that store water [19]                                     | Store water for household activities and drinking              | What containers do you usually store water in? How many? How many litres are they?          | Negative (More stored water reduces vulnerability)                                                                  |
|        | Loss of income of HH [19]                                                   | Loss of income due to cyclone                                  | Have you or your other family members loss income due to cyclone Aila                       | Positive (Higher loss of income increase vulnerability)                                                             |
| Income | Without income during and after cyclone Aila                                | Months stopped from income due to cyclone Aila                 | What time (in month) had you to stop work?                                                  | Positive (Higher stopped months                                                                                     |

|                                     |                                                    |                                                                                   |                                                                                                                                                |                                                                                                                              |
|-------------------------------------|----------------------------------------------------|-----------------------------------------------------------------------------------|------------------------------------------------------------------------------------------------------------------------------------------------|------------------------------------------------------------------------------------------------------------------------------|
|                                     |                                                    |                                                                                   |                                                                                                                                                | increase the vulnerability)                                                                                                  |
|                                     | Income loss for Robbery                            | Every time loss of income of Sundarbans' dependent HHs due to robbery             | Are you attacked by robbers in the forest during resource collection in Sundarbans? How much money have you to pay as ransom for emancipating? | Positive (Higher ransom and frequent attacked by the robbers increase vulnerability)                                         |
| Physical Facilities: Electricity    | Not having solar plant                             | Solar plant ensures the electricity for all time though having electricity or not | Have any solar plant in your house?                                                                                                            | Negative (Solar plant decreases the vulnerability)                                                                           |
| Physical Facilities: School         | Average time to reach nearest primary school [39]  | Average time needed to go to the nearest primary school of the children           | What average time your children need to go to the nearest primary school?                                                                      | Positive (High average time increases the vulnerability)                                                                     |
| Physical Facilities: Transportation | Average time to reach nearest vehicle station [39] | Average time needed to go to the nearest vehicle station                          | What average time you need to go to the nearest vehicle station?                                                                               | Positive (High average time increases the vulnerability)                                                                     |
|                                     | No Access to available transport                   | Availability of transport vehicle in number                                       | How many vehicles you get to move from one place to another?                                                                                   | Negative (Higher number of available transports decrease the vulnerability)                                                  |
| Physical Facilities: Hospital       | Good hospital services received by the HH          | Nearest hospital with better facilities and services                              | Can you get good hospital facilities by you and your family members?                                                                           | Negative (Better hospital services reduce the sensitivity to risk as well as the vulnerability)                              |
| Health Services                     | Getting illness due to disaster                    | Family member(s) become ill due to disaster                                       | Is there any member of your family getting illness due to disaster?                                                                            | Positive (If the number become high it will indicate that they become vulnerable due to the disaster)                        |
|                                     | Affected season                                    | Family member(s) mainly affected by Sidr and Aila                                 | Did your family members or you affected by Sidr and Aila?                                                                                      | Positive (Who are affected by both Sidr and Aila specially they are more vulnerable than those who are affected by only one) |
|                                     | Chronically ill member [39]                        | Number of people reporting at least one chronically ill member                    | Is there any member of your family chronically ill?                                                                                            | Positive (If the number become high it will indicate                                                                         |

|                    |                                                                                   |                                                                                                                        |                                                                                           |                                                                                                             |                                                                                             |
|--------------------|-----------------------------------------------------------------------------------|------------------------------------------------------------------------------------------------------------------------|-------------------------------------------------------------------------------------------|-------------------------------------------------------------------------------------------------------------|---------------------------------------------------------------------------------------------|
| Exposure to Shocks | Natural disaster and their impact                                                 |                                                                                                                        |                                                                                           |                                                                                                             | that they become vulnerable)                                                                |
|                    |                                                                                   | Time to health facility (minutes) [19]                                                                                 | Time that takes the household to get to the nearest health facility                       | How long does it take you to get to a Health care centre?                                                   | Positive (More times needed to go to hospital lead more vulnerable they are)                |
|                    |                                                                                   | Average cost of reaching health facilities [23]                                                                        | Average cost of reaching the health facilities from HH                                    | How much cost you must pay to reach Health care facilities?                                                 | Positive (Higher cost of reaching health facilities greater the sensitivity, Vulnerability) |
|                    |                                                                                   | HH did not receive training on primary health care [23]                                                                | Any sort of training on health and hygiene management                                     | Did you receive any sort of training on health and hygiene management?                                      | Negative (Better training HH received lower the sensitivity to risks, vulnerability)        |
|                    |                                                                                   | HH did not immunize their children [23]                                                                                | Immunization can save children from some deadly diseases                                  | Could you immunize your children?                                                                           | Negative (HH immunized their children lower the sensitivity to risk, vulnerability)         |
|                    |                                                                                   | HH has no member can prepare homemade oral rehydration salts (ORS) [23]                                                | Oral saline (or-saline) can save lives from diarrhoea diseases                            | Can you or your family members prepare or-saline?                                                           | Negative (HH able to prepare or-saline lower the sensitivity to risks, vulnerability)       |
|                    |                                                                                   | Number of natural disasters during the last 10 years [19,37]                                                           | Natural disasters include, among others, cyclone, flood, drought, cyclone, surge, etc.    | How many natural disasters occurred in your village during 2007–2016?                                       | Positive (Occurring many disasters increase vulnerability)                                  |
|                    | Household that did not receive a warning about the pending natural disasters [19] | Household that did not receive a warning about the most severe flood, drought, and cyclone event in the past 10 years. | Did you receive a warning about the flood/cyclone/drought before it happened?             | Negative (Efficient warning system reduce vulnerability)                                                    |                                                                                             |
|                    | Lost or damaged crops, <i>Golpata</i> , Honey etc. [37]                           | Value of the crops, <i>Golpata</i> , Honey damaged due to natural disaster                                             | Was any crop, collection of <i>Golpata</i> , honey etc. damaged due to natural disasters? | Positive (Higher the value of crops, <i>Golpata</i> , honey etc. damaged, more vulnerable is the household) |                                                                                             |
|                    | Damaged or Loss of fish in ponds/gher [37]                                        | Value of the fishes in pond or Gher damaged due to natural disaster                                                    | Was there any damage of pond or Gher fishes due to natural disasters?                     | Positive (Higher the value of fishes damaged, more vulnerable is the household)                             |                                                                                             |
|                    | Livestock damaged [37]                                                            | Value of the livestock damaged due to natural disaster                                                                 | Was there any damage to livestock due to natural disasters?                               | Positive (Higher the value of livestock damaged, more                                                       |                                                                                             |

|                                                                              |                                                                                                |                                                                                                 |                                                                                           |
|------------------------------------------------------------------------------|------------------------------------------------------------------------------------------------|-------------------------------------------------------------------------------------------------|-------------------------------------------------------------------------------------------|
|                                                                              |                                                                                                |                                                                                                 | vulnerable is the household)                                                              |
| House affected by cyclone                                                    | Houses were affected and destroyed due to Aila partially, moderately, fully, or none           | Did your house destroy by Aila? Yes/No. If Yes, then how much? Partially, moderately, or fully) | Positive (Higher affection and destroyed level increase the vulnerability)                |
| Value for damaged household items [37]                                       | Value of the household items damaged due to natural disaster                                   | Were any household items damaged due to natural disasters? Amount of damage in numbers?         | Positive (Higher the value of household items damaged, more vulnerable is the household)  |
| Change in occupation                                                         | Occupation is changed due to natural disaster                                                  | Was there any change in the occupation of your family members due to natural disaster?          | Positive (Higher number of occupational changes indicates vulnerability)                  |
| Average months/days homesteads remained inundated due to cyclone <i>Aila</i> | Number of months or days the homestead of the HH remained inundated due to cyclone <i>Aila</i> | How many days/months your homestead was inundated due to cyclone <i>Aila</i> ?                  | Positive (More days created a severe impact on the HH indicate more vulnerable situation) |

Source: Authors' own draft, based on secondary literature survey.



**Table S3.** A big table of major components, variables (sub-components), and average index values of four Union and their LVI values.

| Sub-Component                                                                    | Munshiganj | Ishwaripur | Gabura   | Buri Gualini | Major Component           | Munshiganj | Ishwaripur | Gabura   | Buri Gualini | Test Statistics ( <i>p</i> -value) |
|----------------------------------------------------------------------------------|------------|------------|----------|--------------|---------------------------|------------|------------|----------|--------------|------------------------------------|
| Dependency                                                                       | 0.538462   | 0.454212   | 0.545788 | 0.501832     | Socio-Demographic Profile | 0.309164   | 0.315638   | 0.310834 | 0.323642     | F = 0.319<br><i>p</i> ≥ 0.05       |
| Education of the head of the household                                           | 0.760684   | 0.722222   | 0.636752 | 0.769231     |                           |            |            |          |              |                                    |
| Female-headed household                                                          | 0.153846   | 0.128205   | 0.230769 | 0.282051     |                           |            |            |          |              |                                    |
| Single headed elderly family                                                     | 0.153846   | 0.128205   | 0.230769 | 0.076923     |                           |            |            |          |              |                                    |
| HH has female with no functional education                                       | 0.333333   | 0.512821   | 0.461538 | 0.435897     |                           |            |            |          |              |                                    |
| HH has girl child aged 10-19 years                                               | 0.239316   | 0.128205   | 0.282051 | 0.119658     |                           |            |            |          |              |                                    |
| Having debt                                                                      | 0.098718   | 0.030609   | 0.036218 | 0.05625      |                           |            |            |          |              |                                    |
| Loan repayment from the income                                                   | 0.222222   | 0.428571   | 0.142857 | 0.388889     |                           |            |            |          |              |                                    |
| Disability in the household                                                      | 0.282051   | 0.307692   | 0.230769 | 0.282051     | Livelihood Strategies     | 0.378077   | 0.452986   | 0.259022 | 0.389957     | F = 18.973<br><i>p</i> ≤ 0.05      |
| Family members working outside the community                                     | 0.812566   | 0.932204   | 0.433099 | 0.805128     |                           |            |            |          |              |                                    |
| Average agricultural and non-agricultural livelihood diversification index (LDI) | 0.512991   | 0.62547    | 0.374359 | 0.688889     |                           |            |            |          |              |                                    |
| Household who has burden of loan                                                 | 0.058547   | 0.100427   | 0.100427 | 0.065812     |                           |            |            |          |              |                                    |
| Household changed sowing and cropping schedule                                   | 0.128205   | 0.153846   | 0.128205 | 0            |                           |            |            |          |              |                                    |
| Help receive: provide ratio                                                      | 0.3125     | 0.353419   | 0.282585 | 0.323718     | Social Network            | 0.508654   | 0.532222   | 0.553953 | 0.444231     | F = 1.236<br><i>p</i> ≥ 0.05       |
| Household that did not apply to their local                                      | 0.538462   | 0.461538   | 0.692308 | 0.333333     |                           |            |            |          |              |                                    |

|                                                                        |          |          |          |          |                |          |          |          |          |                             |
|------------------------------------------------------------------------|----------|----------|----------|----------|----------------|----------|----------|----------|----------|-----------------------------|
| government for assistance in the past 12 months                        |          |          |          |          |                |          |          |          |          |                             |
| Members of Local Committee/ Samiti                                     | 0.435897 | 0.564103 | 0.461538 | 0.487179 |                |          |          |          |          |                             |
| Membership in the micro-credit organization                            | 0.435897 | 0.564103 | 0.461538 | 0.487179 |                |          |          |          |          |                             |
| Access to micro-finance of NGOs                                        | 0.820513 | 0.717949 | 0.871795 | 0.589744 |                |          |          |          |          |                             |
| Struggle to find food                                                  | 0.115385 | 0.108974 | 0.166667 | 0.115385 |                |          |          |          |          |                             |
| Household with primary irrigation source                               | 0.292969 | 0.472039 | 0.35     | 0.3125   |                |          |          |          |          |                             |
| Ability to save harvested crops to eat during a different time of year | 0.880513 | 0.925641 | 0.928718 | 0.953333 | Food Security  | 0.544441 | 0.571622 | 0.345064 | 0.480203 | F = 1.185<br>$p \geq 0.05$  |
| Ability to save seeds to grow the next year                            | 0.777778 | 0.564103 | 0        | 0.625    |                |          |          |          |          |                             |
| Access to free seeds and fertilizer                                    | 0.7      | 0.74359  | 0.625    | 0.875    |                |          |          |          |          |                             |
| Land Productivity                                                      | 0.5      | 0.615385 | 0        | 0        |                |          |          |          |          |                             |
| Decreased quality of fresh water                                       | 0.346154 | 0.628205 | 0.320513 | 0.307692 |                |          |          |          |          |                             |
| Distance to source of natural water                                    | 0.323077 | 0.411282 | 0.152094 | 0.152991 |                |          |          |          |          |                             |
| Whether experienced scarcity of water                                  | 0.25641  | 0.282051 | 0.589744 | 0.358974 | Water Scarcity | 0.375906 | 0.469293 | 0.409035 | 0.360482 | F = 5.337<br>$p \leq 0.05$  |
| Whether the household spent money to get water                         | 0.024103 | 0.04188  | 0.046667 | 0.01106  |                |          |          |          |          |                             |
| Whether household that store water                                     | 0.929788 | 0.983049 | 0.936156 | 0.971692 |                |          |          |          |          |                             |
| Loss of income of HH                                                   | 0.333333 | 0.589744 | 0.487179 | 0.512821 |                |          |          |          |          |                             |
| Without income during and after cyclone Aila                           | 0.564103 | 0.192308 | 0.305556 | 0.373932 | Income         | 0.564103 | 0.294872 | 0.289886 | 0.569089 | F = 20.047<br>$p \leq 0.05$ |
| Income loss for Robbery                                                | 0.794872 | 0.102564 | 0.076923 | 0.820513 |                |          |          |          |          |                             |
| Not having solar plant                                                 | 0.102564 | 0.102564 | 0        | 0.564103 |                | 0.378032 | 0.483757 | 0.291802 | 0.434611 | F = 12.543                  |

|                                                                              |          |          |          |          |                                   |          |          |          |          |                            |
|------------------------------------------------------------------------------|----------|----------|----------|----------|-----------------------------------|----------|----------|----------|----------|----------------------------|
| Average time to reach nearest primary school                                 | 0.314857 | 0.332579 | 0.18816  | 0.242459 | Physical Facilities               | 0.321044 | 0.346215 | 0.415354 | 0.370351 | F = 4.611<br>$p \leq 0.05$ |
| Average time to reach nearest vehicle station                                | 0.495726 | 0.769231 | 0.42735  | 0.538462 |                                   |          |          |          |          |                            |
| No Access to available transport                                             | 0.43855  | 0.470822 | 0.099912 | 0.238285 |                                   |          |          |          |          |                            |
| Good hospital services received by the HH                                    | 0.538462 | 0.74359  | 0.74359  | 0.589744 |                                   |          |          |          |          |                            |
| Getting illness due to disaster                                              | 0.10989  | 0.032967 | 0.227106 | 0.106227 |                                   |          |          |          |          |                            |
| Affected season                                                              | 0.897436 | 0.794872 | 1        | 1        | Health Services                   |          |          |          |          |                            |
| Chronically ill member                                                       | 0.119658 | 0.136752 | 0.213675 | 0.094017 |                                   |          |          |          |          |                            |
| Time to health facility (minutes)                                            | 0.338803 | 0.393162 | 0.558974 | 0.33265  |                                   |          |          |          |          |                            |
| Average cost of reaching health facilities                                   | 0.358974 | 0.25812  | 0.553846 | 0.276068 |                                   |          |          |          |          |                            |
| HH did not receive training on primary health care                           | 0.307692 | 0.589744 | 0.461538 | 0.512821 |                                   |          |          |          |          |                            |
| HH did not immunize their children                                           | 0.153846 | 0.102564 | 0.102564 | 0.307692 | Natural disaster and their impact |          |          |          |          |                            |
| HH has no member can prepare homemade oral rehydration salts (ORS)           | 0.282051 | 0.461538 | 0.205128 | 0.333333 |                                   |          |          |          |          |                            |
| Number of natural disasters during the last 10 years                         | 0.551282 | 0.641026 | 0.467949 | 0.544872 |                                   |          |          |          |          |                            |
| Household that did not receive a warning about the pending natural disasters | 0.102564 | 0.410256 | 0        | 0.358974 |                                   |          |          |          |          |                            |
| Lost or damaged crops, <i>Golpata</i> , Honey etc.                           | 0.948718 | 0.948718 | 1        | 0.897436 |                                   |          |          |          |          |                            |
| Damaged or Loss of fish in ponds/ <i>gher</i>                                | 0.948718 | 1        | 0.923077 | 0.897436 | Natural disaster and their impact |          |          |          |          |                            |
| Livestock damaged                                                            | 0.564103 | 0.564103 | 0.846154 | 0.589744 |                                   |          |          |          |          |                            |

|                                                                              |          |          |                 |          |
|------------------------------------------------------------------------------|----------|----------|-----------------|----------|
| House affected by cyclone                                                    | 0.632479 | 0.307692 | 0.683761        | 0.598291 |
| Value for damaged household items                                            | 0.366987 | 0.144231 | 0.342949        | 0.419872 |
| Change in occupation                                                         | 0.410256 | 0.410256 | 0.564103        | 0.307692 |
| Average months/days homesteads remained inundated due to cyclone <i>Aila</i> | 0.363688 | 0.026188 | 0.600302        | 0.349548 |
| <b>Overall LVI</b>                                                           |          |          |                 |          |
| <b>LVI: Munshiganj</b>                                                       |          |          | <b>0.426367</b> |          |
| <b>LVI: Ishwaripur</b>                                                       |          |          | <b>0.437326</b> |          |
| <b>LVI: Gabura</b>                                                           |          |          | <b>0.403680</b> |          |
| <b>LVI: Buri Gualini</b>                                                     |          |          | <b>0.429341</b> |          |

**Table S4.** Livelihood Vulnerability Index (LVI) sub-component values and minimum and maximum sub-component values for Four Union.

| Dimension         | Major Components          | Sub-Components                                                                              | Unit            | Munshiganj | Ishwaripur | Gabura | Buri Gualini | Max | Min     |
|-------------------|---------------------------|---------------------------------------------------------------------------------------------|-----------------|------------|------------|--------|--------------|-----|---------|
| Adaptive Capacity | Socio-Demographic Profile | Avg. no. of Dependent people                                                                | Persons         | 3.769      | 3.179      | 3.821  | 3.513        | 7   | 0       |
|                   |                           | % of no Primary Education of the head of the household                                      | Percent         | 69.2       | 66.7       | 48.7   | 74.4         | 100 | 0       |
|                   |                           | % of Female-headed household                                                                | Percent         | 15.4       | 12.8       | 48.7   | 28.2         | 100 | 0       |
|                   |                           | % of Single headed elderly family                                                           | Percent         | 15.4       | 12.8       | 23.1   | 7.7          | 100 | 0       |
|                   |                           | % of HH has female with no functional education                                             | Percent         | 33.3       | 51.3       | 46.2   | 43.6         | 100 | 0       |
|                   |                           | % HH has girl child aged 10-19 years                                                        | Percent         | 53.8       | 33.3       | 56.4   | 33.3         | 100 | 0       |
|                   |                           | % of HH having debt                                                                         | Percent         | 46.2       | 17.9       | 17.9   | 46.2         | 100 | 0       |
|                   |                           | % of Non-capability to Loan repayment from the income                                       | Percent         | 22.2       | 42.9       | 14.3   | 38.9         | 100 | 0       |
|                   | Livelihood Strategies     | % of households have disable person(s)                                                      | Percent         | 28.2       | 28.2       | 23.1   | 28.2         | 100 | 0       |
|                   |                           | Avg. family members of the community working outside (1-Ratio: Working outside: HH members) | Persons         | 0.813      | 0.932      | 0.433  | 0.805        | 1   | 0       |
|                   |                           | Avg. agricultural and non-agricultural livelihood diversification index (LDI)               | 1/# livelihoods | 0.326      | 0.366      | 0.277  | 0.389        | 0.5 | 0.14286 |

|             |                     |                                                                                                  |           |        |       |        |        |     |      |
|-------------|---------------------|--------------------------------------------------------------------------------------------------|-----------|--------|-------|--------|--------|-----|------|
| Sensitivity | Social Network      | % of Household who have burden of loan                                                           | Percent   | 38.5   | 59    | 30.8   | 25.6   | 100 | 0    |
|             |                     | % of Household changed sowing and cropping schedule                                              | Percent   | 12.8   | 15.4  | 12.8   | 0      | 100 | 0    |
|             |                     | Help receive: provide ratio                                                                      | Ratio     | 1.25   | 1.414 | 1.130  | 1.295  | 4   | 0    |
|             |                     | % of Household that did not apply to their local government for assistance in the past 12 months | Percent   | 53.8   | 69.2  | 69.2   | 33.3   | 100 | 0    |
|             |                     | % of HH having no membership in Local Committee/ Samiti                                          | Percent   | 43.6   | 46.2  | 46.2   | 48.7   | 100 | 0    |
|             |                     | % of HH having no membership in the micro-credit organization                                    | Percent   | 43.6   | 46.2  | 46.2   | 48.7   | 100 | 0    |
|             |                     | % of HH having no access to micro-finance of NGOs                                                | Percent   | 82.1   | 87.2  | 87.2   | 59     | 100 | 0    |
|             | Food Security       | Avg. no. of months households struggle to find food                                              | Months    | 0.462  | 0.436 | 0.667  | 0.462  | 4   | 0    |
|             |                     | Household with primary irrigation source                                                         | Percent   | 76.56  | 62.24 | 72     | 75     | 20  | 100  |
|             |                     | % of the HH's non-ability to save harvested crops to eat during a different time of year         | Percent   | 66.7   | 56.4  | 82.1   | 79.5   | 100 | 0    |
|             |                     | % of HH having no ability to save seeds to grow the next year                                    | Percent   | 77.8   | 56.4  | 0      | 62.5   | 100 | 0    |
|             |                     | % of HH having no access to free seeds and fertilizer                                            | Percent   | 70     | 74.4  | 62.5   | 87.5   | 100 | 0    |
|             |                     | % of HH having loss of land Productivity                                                         | Percent   | 50     | 61.5  | 0      | 0      | 100 | 0    |
|             | Water Scarcity      | % of HH having no access of safe drinking water                                                  | Percent   | 53.8   | 74.4  | 43.6   | 46.2   | 100 | 0    |
|             |                     | Avg. distance to source of natural water                                                         | Kilometer | 0.969  | 1.23  | 0.456  | 0.459  | 3   | 0    |
|             |                     | % of HH experienced scarcity of water                                                            | Percent   | 25.6   | 28.2  | 59     | 35.9   | 100 | 0    |
|             |                     | Households' avg. spent money to get water                                                        | BDT       | 30.8   | 15.4  | 23.1   | 25.6   | 100 | 0    |
|             |                     | Avg. number of liters of stored water per HH                                                     | Liters    | 229.23 | 70.51 | 210.26 | 104.36 | 20  | 3000 |
|             | Income              | % of HH members have lost of income                                                              | Percent   | 33.3   | 59    | 48.7   | 51.3   | 100 | 0    |
|             |                     | Avg. Months without income during Aila                                                           | Months    | 3.385  | 1.154 | 1.833  | 2.244  | 6   | 0    |
|             |                     | % of HH loss Income loss for Robbery                                                             | Percent   | 79.5   | 10.3  | 7.7    | 82.1   | 100 | 0    |
|             | Physical Facilities | % of HH having no Solar energy as a source of electricity                                        | Percent   | 10.3   | 10.3  | 0      | 56.4   | 100 | 0    |
|             |                     | Avg. time to reach nearest primary school                                                        | Minutes   | 23.41  | 24.62 | 14.79  | 18.49  | 70  | 2    |
|             |                     | Avg. number of available transport (Considered as Negative)                                      | Vehicles  | 2.487  | 3.308 | 2.282  | 2.615  | 4   | 1    |
|             |                     | Avg. time to reach nearest vehicle station                                                       | Minutes   | 27.44  | 29.31 | 7.79   | 15.82  | 60  | 2    |

|                    |                                   |                                                                         |         |       |       |       |       |     |     |
|--------------------|-----------------------------------|-------------------------------------------------------------------------|---------|-------|-------|-------|-------|-----|-----|
| Exposure to Shocks | Health Services                   | % of HH not received Good hospital services                             | Percent | 53.8  | 74.4  | 74.4  | 59    | 100 | 0   |
|                    |                                   | Avg. no. of HH members getting illness due to disaster                  | Persons | 0.769 | 0.231 | 1.590 | 0.744 | 7   | 0   |
|                    |                                   | % of household member(s) affected by Sidr and Aila                      | Percent | 89.7  | 79.5  | 100   | 100   | 100 | 0   |
|                    |                                   | Avg. no. of chronically ill member                                      | Persons | 0.359 | 0.410 | 0.641 | 0.282 | 3   | 0   |
|                    |                                   | Avg. time to reach health facility                                      | Minutes | 30.41 | 34.49 | 46.92 | 29.95 | 80  | 5   |
|                    |                                   | Avg. cost of reaching health facilities                                 | BDT     | 53.85 | 38.72 | 83.08 | 41.41 | 150 | 0   |
|                    |                                   | % HH did not receive training on primary health care                    | Percent | 30.8  | 59    | 46.2  | 51.3  | 100 | 0   |
|                    |                                   | % of HH did not immunize their children                                 | Percent | 15.4  | 10.3  | 10.3  | 30.8  | 100 | 0   |
|                    | Natural disaster and their impact | % HH having no member who can prepare or-saline                         | Percent | 28.2  | 46.2  | 20.5  | 33.3  | 100 | 0   |
|                    |                                   | Avg. no. of natural disasters during the last 10 years                  | Count   | 3.205 | 3.564 | 2.872 | 3.179 | 5   | 1   |
|                    |                                   | % HH that did not receive a warning about the pending natural disasters | Percent | 10.3  | 41    | 0     | 35.9  | 100 | 0   |
|                    |                                   | % of HH respond against lost or damaged crops, Golpata, Honey etc.      | Percent | 94.9  | 94.9  | 100   | 89.7  | 100 | 0   |
|                    |                                   | % of HH respond against damaged or Loss of fish in ponds/gher           | Percent | 94.9  | 100   | 92.3  | 89.7  | 100 | 0   |
|                    |                                   | % HHs' livestock damaged                                                | Percent | 56.4  | 56.4  | 84.6  | 59    | 100 | 0   |
|                    |                                   | % of House affected by cyclone                                          | Percent | 97.4  | 69.2  | 100   | 92.3  | 100 | 0   |
|                    |                                   | Avg. no. of HH items damaged                                            | Count   | 5.872 | 2.308 | 5.487 | 6.718 | 16  | 0   |
|                    |                                   | % of HH change in occupation                                            | Percent | 41    | 41    | 56.4  | 30.8  | 100 | 0   |
|                    |                                   | Avg. months homesteads remained inundated due to cyclone Aila           | Months  | 5.346 | 0.756 | 8.564 | 5.154 | 14  | 0.4 |

Table S5. Distribution of the households' LVI within the lowly (or less) vulnerable category.

|     | Munshiganj |       |       |       |       |       |       |       |       |       | Ishwaripur |       |       |       |       |       |
|-----|------------|-------|-------|-------|-------|-------|-------|-------|-------|-------|------------|-------|-------|-------|-------|-------|
|     | 0.287      | 0.308 | 0.335 | 0.339 | 0.354 | 0.358 | 0.361 | 0.367 | 0.373 | 0.374 | 0.377      | 0.345 | 0.355 | 0.371 | 0.377 | 0.378 |
| SDP | 0.393      | 0.314 | 0.265 | 0.238 | 0.154 | 0.147 | 0.309 | 0.234 | 0.252 | 0.187 | 0.168      | 0.109 | 0.091 | 0.421 | 0.415 | 0.353 |
| LS  | 0.292      | 0.198 | 0.383 | 0.383 | 0.675 | 0.225 | 0.271 | 0.350 | 0.508 | 0.242 | 0.392      | 0.500 | 0.517 | 0.329 | 0.383 | 0.417 |
| SN  | 0.038      | 0.033 | 0.838 | 0.425 | 0.275 | 0.500 | 0.275 | 0.233 | 0.075 | 0.233 | 0.500      | 0.500 | 0.033 | 0.438 | 0.838 | 0.233 |
| FS  | 0.500      | 0.479 | 0.100 | 0.500 | 0.200 | 0.479 | 0.667 | 0.333 | 0.313 | 0.500 | 0.480      | 0.560 | 0.600 | 0.512 | 0.333 | 0.577 |
| WS  | 0.365      | 0.289 | 0.391 | 0.397 | 0.027 | 0.498 | 0.364 | 0.364 | 0.215 | 0.462 | 0.321      | 0.232 | 0.465 | 0.529 | 0.297 | 0.466 |

|     |        |       |       |       |       |       |       |       |              |       |       |       |       |       |       |       |
|-----|--------|-------|-------|-------|-------|-------|-------|-------|--------------|-------|-------|-------|-------|-------|-------|-------|
| I   | 0.444  | 0.222 | 0.556 | 0.833 | 0.500 | 0.500 | 0.556 | 0.222 | 0.500        | 0.833 | 0.611 | 0.389 | 0.000 | 0.056 | 0.056 | 0.500 |
| PF  | 0.379  | 0.231 | 0.118 | 0.364 | 0.584 | 0.431 | 0.550 | 0.518 | 0.571        | 0.350 | 0.364 | 0.441 | 0.608 | 0.245 | 0.367 | 0.352 |
| HS  | 0.092  | 0.335 | 0.233 | 0.075 | 0.285 | 0.201 | 0.333 | 0.385 | 0.361        | 0.463 | 0.260 | 0.267 | 0.350 | 0.242 | 0.243 | 0.167 |
| NDI | 0.422  | 0.503 | 0.333 | 0.350 | 0.606 | 0.461 | 0.254 | 0.545 | 0.571        | 0.402 | 0.494 | 0.320 | 0.455 | 0.419 | 0.390 | 0.442 |
|     | Gabura |       |       |       |       |       |       |       | Buri Gualini |       |       |       |       |       |       |       |
|     | 0.319  | 0.337 | 0.338 | 0.346 | 0.361 | 0.362 | 0.364 | 0.370 | 0.373        | 0.375 | 0.349 | 0.353 | 0.359 | 0.362 | 0.363 | 0.370 |
| SDP | 0.060  | 0.318 | 0.186 | 0.119 | 0.241 | 0.210 | 0.073 | 0.156 | 0.441        | 0.293 | 0.380 | 0.411 | 0.415 | 0.167 | 0.326 | 0.291 |
| LS  | 0.075  | 0.483 | 0.242 | 0.150 | 0.536 | 0.183 | 0.075 | 0.225 | 0.297        | 0.225 | 0.375 | 0.342 | 0.258 | 0.383 | 0.275 | 0.375 |
| SN  | 0.413  | 0.350 | 0.450 | 0.300 | 0.450 | 0.050 | 0.850 | 0.450 | 0.550        | 0.450 | 0.475 | 0.100 | 0.225 | 0.050 | 0.025 | 0.450 |
| FS  | 0.360  | 0.500 | 0.354 | 0.875 | 0.500 | 0.500 | 0.300 | 0.417 | 0.080        | 0.500 | 0.625 | 0.500 | 0.500 | 0.410 | 0.560 | 0.500 |
| WS  | 0.389  | 0.258 | 0.378 | 0.390 | 0.221 | 0.335 | 0.389 | 0.515 | 0.404        | 0.355 | 0.320 | 0.455 | 0.200 | 0.359 | 0.398 | 0.201 |
| I   | 0.389  | 0.111 | 0.111 | 0.444 | 0.833 | 0.611 | 0.444 | 0.111 | 0.111        | 0.056 | 0.389 | 0.444 | 0.056 | 0.778 | 0.444 | 0.389 |
| PF  | 0.301  | 0.112 | 0.362 | 0.049 | 0.111 | 0.341 | 0.286 | 0.333 | 0.382        | 0.367 | 0.304 | 0.034 | 0.544 | 0.455 | 0.199 | 0.298 |
| HS  | 0.275  | 0.343 | 0.301 | 0.285 | 0.276 | 0.479 | 0.408 | 0.419 | 0.251        | 0.408 | 0.201 | 0.176 | 0.602 | 0.277 | 0.318 | 0.267 |
| NDI | 0.568  | 0.485 | 0.519 | 0.706 | 0.459 | 0.559 | 0.510 | 0.570 | 0.534        | 0.538 | 0.336 | 0.653 | 0.269 | 0.583 | 0.603 | 0.592 |

Table S6. Distribution of the households' LVI within the moderately vulnerable category.

|     | Munshiganj |       |       |       |       |       |       |       |       |       |       |       |       |       |       |       |       |       |       |       |       |       |       |
|-----|------------|-------|-------|-------|-------|-------|-------|-------|-------|-------|-------|-------|-------|-------|-------|-------|-------|-------|-------|-------|-------|-------|-------|
|     | 0.386      | 0.388 | 0.400 | 0.402 | 0.407 | 0.414 | 0.421 | 0.428 | 0.428 | 0.429 | 0.430 | 0.432 | 0.435 | 0.441 | 0.444 | 0.449 | 0.450 | 0.464 | 0.467 | 0.470 |       |       |       |
| SDP | 0.367      | 0.212 | 0.179 | 0.263 | 0.136 | 0.225 | 0.363 | 0.448 | 0.058 | 0.109 | 0.370 | 0.416 | 0.409 | 0.320 | 0.464 | 0.429 | 0.478 | 0.190 | 0.388 | 0.446 |       |       |       |
| LS  | 0.400      | 0.408 | 0.500 | 0.439 | 0.525 | 0.512 | 0.383 | 0.300 | 0.179 | 0.190 | 0.342 | 0.283 | 0.383 | 0.429 | 0.358 | 0.425 | 0.367 | 0.290 | 0.567 | 0.262 |       |       |       |
| SN  | 0.267      | 0.433 | 0.438 | 0.633 | 0.750 | 0.850 | 0.838 | 0.275 | 0.475 | 0.475 | 0.850 | 0.850 | 0.633 | 0.475 | 0.100 | 0.100 | 0.038 | 0.700 | 0.475 | 0.425 |       |       |       |
| FS  | 0.660      | 0.458 | 0.710 | 0.542 | 0.552 | 0.500 | 0.300 | 0.729 | 0.540 | 0.500 | 0.875 | 0.500 | 0.583 | 0.760 | 0.625 | 0.625 | 0.780 | 0.375 | 0.333 | 0.850 |       |       |       |
| WS  | 0.358      | 0.428 | 0.201 | 0.455 | 0.235 | 0.325 | 0.297 | 0.401 | 0.668 | 0.588 | 0.551 | 0.388 | 0.341 | 0.428 | 0.308 | 0.528 | 0.528 | 0.341 | 0.188 | 0.421 |       |       |       |
| I   | 0.111      | 0.833 | 0.833 | 0.556 | 0.611 | 0.222 | 0.444 | 0.444 | 0.167 | 0.611 | 0.444 | 0.611 | 0.556 | 0.556 | 0.278 | 0.778 | 0.889 | 0.944 | 0.889 | 0.500 |       |       |       |
| PF  | 0.199      | 0.115 | 0.268 | 0.396 | 0.283 | 0.584 | 0.500 | 0.068 | 0.564 | 0.497 | 0.352 | 0.266 | 0.416 | 0.100 | 0.643 | 0.515 | 0.216 | 0.559 | 0.498 | 0.231 |       |       |       |
| HS  | 0.180      | 0.233 | 0.317 | 0.242 | 0.267 | 0.176 | 0.243 | 0.282 | 0.568 | 0.283 | 0.175 | 0.233 | 0.286 | 0.386 | 0.535 | 0.274 | 0.269 | 0.443 | 0.479 | 0.344 |       |       |       |
| NDI | 0.674      | 0.627 | 0.439 | 0.398 | 0.577 | 0.505 | 0.501 | 0.686 | 0.576 | 0.723 | 0.394 | 0.501 | 0.425 | 0.577 | 0.558 | 0.559 | 0.604 | 0.590 | 0.521 | 0.660 |       |       |       |
|     | Ishwaripur |       |       |       |       |       |       |       |       |       |       |       |       |       |       |       |       |       |       |       |       |       |       |
|     | 0.383      | 0.385 | 0.387 | 0.388 | 0.395 | 0.396 | 0.398 | 0.405 | 0.412 | 0.417 | 0.418 | 0.419 | 0.421 | 0.425 | 0.428 | 0.430 | 0.442 | 0.446 | 0.447 | 0.458 | 0.461 | 0.464 | 0.470 |
| SDP | 0.129      | 0.417 | 0.418 | 0.168 | 0.263 | 0.186 | 0.299 | 0.342 | 0.485 | 0.176 | 0.379 | 0.329 | 0.372 | 0.259 | 0.109 | 0.182 | 0.497 | 0.204 | 0.113 | 0.234 | 0.488 | 0.275 | 0.357 |
| LS  | 0.473      | 0.383 | 0.375 | 0.383 | 0.550 | 0.400 | 0.333 | 0.500 | 0.383 | 0.500 | 0.500 | 0.383 | 0.467 | 0.433 | 0.775 | 0.325 | 0.408 | 0.383 | 0.417 | 0.392 | 0.517 | 0.417 | 0.545 |
| SN  | 0.450      | 0.100 | 0.033 | 0.550 | 0.238 | 0.875 | 0.433 | 0.950 | 0.233 | 0.500 | 0.900 | 0.350 | 0.600 | 0.440 | 0.050 | 0.830 | 0.275 | 0.700 | 0.950 | 0.838 | 0.430 | 0.250 | 1.000 |
| FS  | 0.615      | 0.529 | 0.533 | 0.600 | 0.604 | 0.375 | 0.413 | 0.406 | 0.563 | 0.529 | 0.438 | 0.643 | 0.293 | 0.448 | 0.813 | 0.646 | 0.404 | 0.515 | 0.615 | 0.615 | 0.563 | 0.535 | 0.333 |
| WS  | 0.758      | 0.538 | 0.472 | 0.500 | 0.365 | 0.438 | 0.565 | 0.335 | 0.496 | 0.267 | 0.201 | 0.552 | 0.208 | 0.532 | 0.333 | 0.466 | 0.533 | 0.465 | 0.551 | 0.433 | 0.432 | 0.729 | 0.208 |
| I   | 0.361      | 0.167 | 0.056 | 0.056 | 0.000 | 0.222 | 0.056 | 0.056 | 0.056 | 0.389 | 0.056 | 0.222 | 0.500 | 0.389 | 0.361 | 0.361 | 0.389 | 0.556 | 0.500 | 0.389 | 0.333 | 0.333 | 0.833 |
| PF  | 0.167      | 0.242 | 0.466 | 0.534 | 0.638 | 0.466 | 0.364 | 0.481 | 0.297 | 0.555 | 0.511 | 0.384 | 0.666 | 0.692 | 0.717 | 0.184 | 0.498 | 0.453 | 0.498 | 0.443 | 0.643 | 0.564 | 0.466 |
| HS  | 0.300      | 0.408 | 0.417 | 0.179 | 0.489 | 0.258 | 0.192 | 0.350 | 0.445 | 0.485 | 0.468 | 0.442 | 0.192 | 0.350 | 0.283 | 0.338 | 0.333 | 0.330 | 0.333 | 0.283 | 0.317 | 0.350 | 0.493 |

| NDI | 0.371        | 0.468 | 0.454 | 0.528 | 0.321 | 0.448 | 0.711 | 0.280 | 0.455 | 0.430 | 0.280 | 0.397 | 0.597 | 0.436 | 0.552 | 0.556 | 0.558 | 0.556 | 0.362 | 0.574 | 0.442 | 0.667 | 0.338 |
|-----|--------------|-------|-------|-------|-------|-------|-------|-------|-------|-------|-------|-------|-------|-------|-------|-------|-------|-------|-------|-------|-------|-------|-------|
|     | Gabura       |       |       |       |       |       |       |       |       |       |       |       |       |       |       |       |       |       |       |       |       |       |       |
|     | 0.380        | 0.385 | 0.400 | 0.407 | 0.407 | 0.410 | 0.413 | 0.414 | 0.420 | 0.420 | 0.426 | 0.427 | 0.427 | 0.428 | 0.434 | 0.436 | 0.440 | 0.443 | 0.447 | 0.452 | 0.453 | 0.457 | 0.472 |
| SDP | 0.308        | 0.228 | 0.234 | 0.397 | 0.345 | 0.286 | 0.332 | 0.393 | 0.418 | 0.443 | 0.505 | 0.488 | 0.381 | 0.185 | 0.423 | 0.387 | 0.186 | 0.279 | 0.470 | 0.173 | 0.543 | 0.479 | 0.408 |
| LS  | 0.276        | 0.283 | 0.137 | 0.137 | 0.125 | 0.227 | 0.225 | 0.242 | 0.333 | 0.667 | 0.217 | 0.140 | 0.146 | 0.158 | 0.134 | 0.200 | 0.558 | 0.400 | 0.075 | 0.276 | 0.233 | 0.311 | 0.225 |
| SN  | 0.450        | 0.825 | 0.450 | 0.850 | 0.425 | 0.850 | 0.450 | 0.850 | 0.817 | 0.250 | 0.450 | 0.450 | 0.425 | 0.450 | 0.850 | 0.450 | 0.700 | 0.500 | 0.825 | 0.825 | 0.450 | 0.250 | 0.850 |
| FS  | 0.375        | 0.500 | 0.340 | 0.500 | 0.667 | 0.750 | 0.625 | 0.080 | 0.167 | 0.500 | 0.500 | 0.750 | 0.625 | 0.625 | 0.458 | 0.500 | 0.333 | 0.750 | 0.500 | 0.750 | 0.417 | 0.530 | 0.625 |
| WS  | 0.395        | 0.396 | 0.408 | 0.221 | 0.501 | 0.221 | 0.361 | 0.208 | 0.395 | 0.398 | 0.628 | 0.432 | 0.403 | 0.548 | 0.648 | 0.661 | 0.258 | 0.448 | 0.548 | 0.321 | 0.588 | 0.251 | 0.548 |
| I   | 0.444        | 0.056 | 0.500 | 0.056 | 0.389 | 0.028 | 0.056 | 0.500 | 0.167 | 0.056 | 0.389 | 0.389 | 0.389 | 0.556 | 0.167 | 0.167 | 0.111 | 0.056 | 0.056 | 0.389 | 0.500 | 0.667 | 0.056 |
| PF  | 0.359        | 0.101 | 0.234 | 0.305 | 0.228 | 0.159 | 0.297 | 0.367 | 0.347 | 0.066 | 0.225 | 0.187 | 0.373 | 0.332 | 0.167 | 0.249 | 0.303 | 0.367 | 0.320 | 0.367 | 0.244 | 0.263 | 0.320 |
| HS  | 0.276        | 0.443 | 0.623 | 0.418 | 0.318 | 0.402 | 0.513 | 0.436 | 0.436 | 0.361 | 0.406 | 0.283 | 0.461 | 0.508 | 0.267 | 0.367 | 0.611 | 0.444 | 0.250 | 0.501 | 0.301 | 0.495 | 0.250 |
| NDI | 0.526        | 0.509 | 0.525 | 0.538 | 0.626 | 0.621 | 0.626 | 0.542 | 0.532 | 0.751 | 0.442 | 0.685 | 0.575 | 0.582 | 0.606 | 0.692 | 0.641 | 0.693 | 0.686 | 0.604 | 0.643 | 0.693 | 0.772 |
|     | Buri Gualini |       |       |       |       |       |       |       |       |       |       |       |       |       |       |       |       |       |       |       |       |       |       |
|     | 0.389        | 0.390 | 0.392 | 0.394 | 0.395 | 0.400 | 0.404 | 0.406 | 0.408 | 0.410 | 0.412 | 0.413 | 0.416 | 0.417 | 0.419 | 0.421 | 0.433 | 0.435 | 0.444 | 0.446 | 0.448 | 0.464 |       |
| SDP | 0.361        | 0.088 | 0.398 | 0.179 | 0.293 | 0.222 | 0.418 | 0.253 | 0.301 | 0.168 | 0.307 | 0.335 | 0.351 | 0.371 | 0.446 | 0.233 | 0.480 | 0.256 | 0.339 | 0.238 | 0.355 | 0.216 |       |
| LS  | 0.328        | 0.417 | 0.312 | 0.438 | 0.371 | 0.475 | 0.417 | 0.472 | 0.342 | 0.342 | 0.283 | 0.333 | 0.450 | 0.439 | 0.450 | 0.300 | 0.542 | 0.333 | 0.383 | 0.371 | 0.240 | 0.600 |       |
| SN  | 0.500        | 0.650 | 0.050 | 0.100 | 0.475 | 0.825 | 0.100 | 0.050 | 0.275 | 0.250 | 0.500 | 0.833 | 0.500 | 0.300 | 0.675 | 0.633 | 0.433 | 0.750 | 0.450 | 0.450 | 0.050 | 0.650 |       |
| FS  | 0.500        | 0.500 | 0.875 | 0.500 | 0.320 | 0.368 | 0.500 | 0.500 | 0.500 | 0.372 | 0.500 | 0.460 | 0.563 | 0.750 | 0.500 | 0.458 | 0.750 | 0.500 | 0.563 | 0.500 | 0.564 | 0.542 |       |
| WS  | 0.457        | 0.455 | 0.213 | 0.308 | 0.335 | 0.432 | 0.201 | 0.355 | 0.365 | 0.523 | 0.405 | 0.455 | 0.301 | 0.306 | 0.211 | 0.200 | 0.231 | 0.355 | 0.205 | 0.415 | 0.532 | 0.468 |       |
| I   | 0.444        | 0.722 | 0.722 | 0.611 | 0.944 | 0.444 | 0.500 | 0.722 | 0.222 | 0.389 | 0.667 | 0.722 | 0.444 | 0.722 | 0.222 | 0.722 | 0.722 | 0.833 | 0.556 | 0.778 | 0.722 | 0.056 |       |
| PF  | 0.138        | 0.493 | 0.461 | 0.459 | 0.429 | 0.243 | 0.332 | 0.561 | 0.564 | 0.661 | 0.451 | 0.344 | 0.364 | 0.263 | 0.429 | 0.268 | 0.103 | 0.332 | 0.486 | 0.562 | 0.426 | 0.458 |       |
| HS  | 0.160        | 0.267 | 0.169 | 0.511 | 0.175 | 0.364 | 0.369 | 0.361 | 0.333 | 0.375 | 0.442 | 0.258 | 0.325 | 0.435 | 0.292 | 0.658 | 0.285 | 0.342 | 0.350 | 0.425 | 0.471 | 0.475 |       |
| NDI | 0.646        | 0.381 | 0.652 | 0.541 | 0.519 | 0.394 | 0.685 | 0.565 | 0.650 | 0.600 | 0.377 | 0.304 | 0.533 | 0.467 | 0.512 | 0.429 | 0.600 | 0.523 | 0.688 | 0.536 | 0.644 | 0.621 |       |

**Table S7.** Distribution of the households' LVI within highly vulnerable category.

|     | Munshiganj |       |       |       |       |       |       |       |       |       | Ishwaripur   |       |       |       |       |       |       |       |       |  |
|-----|------------|-------|-------|-------|-------|-------|-------|-------|-------|-------|--------------|-------|-------|-------|-------|-------|-------|-------|-------|--|
|     | 0.473      | 0.488 | 0.491 | 0.494 | 0.497 | 0.511 | 0.540 | 0.553 | 0.480 | 0.481 | 0.484        | 0.487 | 0.490 | 0.495 | 0.497 | 0.505 | 0.520 | 0.530 | 0.565 |  |
| SDP | 0.417      | 0.329 | 0.210 | 0.548 | 0.388 | 0.519 | 0.522 | 0.448 | 0.226 | 0.229 | 0.418        | 0.418 | 0.446 | 0.369 | 0.179 | 0.438 | 0.339 | 0.418 | 0.245 |  |
| LS  | 0.333      | 0.312 | 0.512 | 0.348 | 0.494 | 0.333 | 0.450 | 0.500 | 0.325 | 0.342 | 0.387        | 0.442 | 0.350 | 0.750 | 0.458 | 0.383 | 0.469 | 0.758 | 0.612 |  |
| SN  | 0.833      | 0.850 | 0.875 | 0.900 | 0.700 | 0.475 | 0.850 | 0.850 | 0.660 | 0.400 | 0.883        | 0.230 | 0.875 | 0.617 | 0.475 | 0.450 | 0.850 | 0.450 | 0.850 |  |
| FS  | 0.500      | 0.500 | 0.550 | 0.540 | 0.500 | 0.719 | 0.398 | 0.529 | 0.750 | 0.583 | 0.802        | 0.563 | 0.640 | 0.627 | 0.886 | 0.771 | 0.792 | 0.729 | 0.563 |  |
| WS  | 0.255      | 0.461 | 0.426 | 0.329 | 0.405 | 0.205 | 0.528 | 0.381 | 0.499 | 0.599 | 0.432        | 0.805 | 0.528 | 0.532 | 0.429 | 0.565 | 0.530 | 0.418 | 0.599 |  |
| I   | 0.500      | 0.111 | 0.500 | 0.444 | 0.778 | 0.889 | 0.778 | 0.944 | 0.333 | 0.389 | 0.389        | 0.333 | 0.333 | 0.000 | 0.694 | 0.333 | 0.000 | 0.667 | 0.389 |  |
| PF  | 0.408      | 0.320 | 0.367 | 0.132 | 0.231 | 0.500 | 0.446 | 0.611 | 0.483 | 0.611 | 0.483        | 0.384 | 0.416 | 0.628 | 0.413 | 0.529 | 0.697 | 0.698 | 0.584 |  |
| HS  | 0.292      | 0.610 | 0.342 | 0.344 | 0.411 | 0.410 | 0.545 | 0.333 | 0.408 | 0.550 | 0.226        | 0.326 | 0.350 | 0.303 | 0.402 | 0.250 | 0.483 | 0.317 | 0.585 |  |
| NDI | 0.689      | 0.630 | 0.711 | 0.702 | 0.662 | 0.606 | 0.499 | 0.651 | 0.597 | 0.574 | 0.445        | 0.737 | 0.475 | 0.580 | 0.650 | 0.716 | 0.441 | 0.553 | 0.721 |  |
|     | Gabura     |       |       |       |       |       |       |       |       |       | Buri Gualini |       |       |       |       |       |       |       |       |  |



|            | 0.473 | 0.477 | 0.501 | 0.508 | 0.512 | 0.518 | 0.473 | 0.477 | 0.477 | 0.477 | 0.479 | 0.482 | 0.483 | 0.497 | 0.513 | 0.514 | 0.522 |
|------------|-------|-------|-------|-------|-------|-------|-------|-------|-------|-------|-------|-------|-------|-------|-------|-------|-------|
| <b>SDP</b> | 0.524 | 0.185 | 0.405 | 0.530 | 0.323 | 0.458 | 0.376 | 0.336 | 0.272 | 0.430 | 0.372 | 0.304 | 0.429 | 0.274 | 0.327 | 0.353 | 0.369 |
| <b>LS</b>  | 0.496 | 0.158 | 0.175 | 0.554 | 0.179 | 0.321 | 0.383 | 0.500 | 0.500 | 0.500 | 0.383 | 0.333 | 0.500 | 0.500 | 0.308 | 0.321 | 0.333 |
| <b>SN</b>  | 0.300 | 0.850 | 0.450 | 0.300 | 0.850 | 0.850 | 0.450 | 0.875 | 0.500 | 0.425 | 0.450 | 0.500 | 0.250 | 0.450 | 0.850 | 0.900 | 0.850 |
| <b>FS</b>  | 0.500 | 0.500 | 0.667 | 0.583 | 0.625 | 0.750 | 0.500 | 0.458 | 0.500 | 0.417 | 0.500 | 0.625 | 0.750 | 0.750 | 0.540 | 0.500 | 0.500 |
| <b>WS</b>  | 0.255 | 0.478 | 0.528 | 0.391 | 0.408 | 0.475 | 0.261 | 0.267 | 0.595 | 0.525 | 0.228 | 0.618 | 0.608 | 0.615 | 0.265 | 0.228 | 0.191 |
| <b>I</b>   | 0.333 | 0.389 | 0.389 | 0.389 | 0.389 | 0.056 | 0.556 | 0.389 | 0.611 | 0.694 | 0.778 | 0.944 | 0.361 | 0.500 | 0.361 | 0.778 | 0.833 |
| <b>PF</b>  | 0.448 | 0.434 | 0.429 | 0.431 | 0.382 | 0.434 | 0.584 | 0.680 | 0.602 | 0.357 | 0.498 | 0.621 | 0.564 | 0.686 | 0.468 | 0.530 | 0.700 |
| <b>HS</b>  | 0.620 | 0.567 | 0.525 | 0.508 | 0.587 | 0.577 | 0.325 | 0.235 | 0.360 | 0.340 | 0.468 | 0.486 | 0.480 | 0.502 | 0.510 | 0.542 | 0.517 |
| <b>NDI</b> | 0.560 | 0.642 | 0.744 | 0.706 | 0.722 | 0.594 | 0.778 | 0.628 | 0.558 | 0.650 | 0.679 | 0.356 | 0.525 | 0.511 | 0.785 | 0.571 | 0.568 |

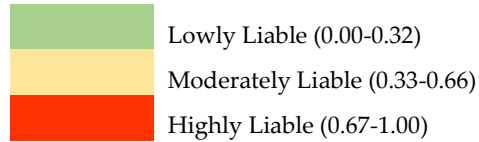

**Table S8.** Dimensions and variables and their unit of measurement for constructing asset deprivation index.

| Dimensions        | Variables                                                                            | Unit of measurement |
|-------------------|--------------------------------------------------------------------------------------|---------------------|
| Human capital     | No vocational training                                                               | Count               |
|                   | No training on disaster management                                                   | Count               |
|                   | No knowledge about modern, intensive farming techniques                              | Count               |
|                   | Non-earning members' ratio in comparison to household members                        | Count               |
|                   | Non-Skilled labour ratio in comparison to household members                          | Count               |
| Natural capital   | Disability or chronically illness of household head                                  | Yes/No              |
|                   | Having homestead land (Consider as Negative)                                         | Count               |
|                   | Having agriculture land (Consider as Negative)                                       | Count               |
|                   | Access to open-water fishing (no. of months) (Consider as Negative)                  | Count               |
|                   | Access to forest-based energy for cooking purpose (Consider as negative)             | Count               |
|                   | Average time to fetch firewood                                                       | Count               |
|                   | Scarcity of firewood                                                                 | Count               |
|                   | No Access to <i>khas</i> land                                                        | Count               |
|                   | Frequency of visits in Sundarbans or sea last year (Consider as Negative)            | Count               |
|                   | Having no chicken/ducks                                                              | Count               |
| Social Capital    | Having no goats                                                                      | Count               |
|                   | Having no cattle/ cow                                                                | Count               |
|                   | Any help or assistance received from other households in the community, GOs and NGOs | Yes/No              |
|                   | Any help or assistance got from local Union/Upazila representatives in the last year | Yes/No              |
|                   | Having access to old allowances                                                      | Yes/No              |
|                   | Having access to Vulnerable Group Development (VGD)                                  | Yes/No              |
|                   | Having access to Vulnerable Group Feeding (VGF)                                      | Yes/No              |
| Physical Capital  | HH members receive School Stipend                                                    | Yes/No              |
|                   | No membership in local committee or co-operatives                                    | Count               |
|                   | Not having television or radio                                                       | Count               |
|                   | No access to mobile phone                                                            | Count               |
|                   | Not having own rainwater reservoir                                                   | Count               |
|                   | Decreased quality of drinking water                                                  | Yes/No              |
|                   | No Access to available transport                                                     | Count               |
|                   | HH having bicycle (Consider as Negative)                                             | Yes/No              |
|                   | Housing condition or Construction materials of the house                             | Yes/No              |
|                   | House affected by the storms                                                         | Yes/No              |
|                   | Not having cyclone shelter near to the house                                         | Count               |
|                   | Unhygienic sanitary latrine                                                          | Yes/No              |
|                   | Not having electricity in the house                                                  | Count               |
|                   | Not having solar energy as a source of electricity                                   | Count               |
| Financial Capital | Having no jewellery                                                                  | Count               |
|                   | Amount of cash savings (Consider as Negative)                                        | Count               |
|                   | No membership in the micro-credit organisations                                      | Count               |
|                   | Having savings in the bank or NGO (Consider as Negative)                             | Yes/No              |
|                   | No Regular inflows of money: Remittance                                              | Count               |

## No access to NGOs' micro-finance projects

Count

**Table S9.** ANOVA and Chi-squared test to understand significant difference of mean and frequency of different variables between study communities (or four Unions).

| Variables                                                                                   | F statistics       | Chi-squared statistics | Sig.     |
|---------------------------------------------------------------------------------------------|--------------------|------------------------|----------|
| <b>Human Capital</b>                                                                        |                    |                        |          |
| No Vocational Training                                                                      | --                 | $\chi^2(3) = 20.558$   | 0.000*** |
| No training on disaster management                                                          | --                 | $\chi^2(3) = 5.710$    | 0.127    |
| No Knowledge about modern, intensive farming techniques                                     | F (3,152) = 1      | --                     | 0.395    |
| Non-earning members' ratio in comparison to HH members                                      | F (3,152) = .962   | --                     | 0.412    |
| Non-Skilled labor ratio in comparison to HH members                                         | F (3,152) = 1.586  | --                     | 0.195    |
| Health Status                                                                               | F (3,152) = 12.44  | --                     | 0.000*** |
| <b>Natural or agriculture Capital</b>                                                       |                    |                        |          |
| Having homestead land (Consider as Negative)                                                | F (3,152) = .574   | --                     | 0.633    |
| Having agriculture land (Consider as Negative)                                              | F (3,152) = 2.957  | --                     | 0.034**  |
| No Access to fishing (no. of months)                                                        | F (3,152) = 13.026 | --                     | 0.000*** |
| Access to forest-based energy for cooking purpose (Consider as negative)                    | F (3,152) = 4.475  | --                     | 0.005**  |
| Average time to fetch firewood                                                              | F (3,152) = .195   | --                     | 0.824    |
| Scarcity of firewood                                                                        | --                 | $\chi^2(3) = 2.772$    | 0.250    |
| No Access to khas land                                                                      | --                 | $\chi^2(3) = 23.833$   | 0.000*** |
| Frequency of visits in Sundarbans or sea last year (Consider as Negative)                   | F (3,152) = 23.184 | --                     | 0.000*** |
| Having no Chicken/ducks                                                                     | --                 | $\chi^2(3) = 6.323$    | 0.097*   |
| Having no Goats                                                                             | --                 | $\chi^2(3) = 15.462$   | 0.001*** |
| Having no Cattle/ cow                                                                       | --                 | $\chi^2(3) = 26.232$   | 0.000*** |
| <b>Social Capital</b>                                                                       |                    |                        |          |
| Help receive: provide ratio                                                                 | F (3,152) = 1.054  | --                     | 0.371    |
| Household that did not apply to their local government for assistance in the past 12 months | --                 | $\chi^2(3) = 10.54$    | 0.014**  |
| Having access to old allowances                                                             | --                 | $\chi^2(3) = 10.029$   | 0.018**  |
| Having access to VGD (vulnerable group development) allowances                              | --                 | $\chi^2(3) = 1.486$    | 0.686    |
| Having access to VGF                                                                        | --                 | $\chi^2(3) = 1.460$    | 0.692    |
| HH members receive School Stipend                                                           | --                 | $\chi^2(3) = .610$     | 0.894    |
| No membership in Local Committee/ Samiti                                                    | --                 | $\chi^2(3) = 1.437$    | 0.697    |
| <b>Physical Capital</b>                                                                     |                    |                        |          |
| Not having television or radio                                                              | --                 | $\chi^2(3) = 9.246$    | 0.026**  |
| No access to mobile phone                                                                   | --                 | $\chi^2(3) = 7.892$    | 0.048**  |
| Not having own rainwater reservoir                                                          | --                 | $\chi^2(3) = 3.567$    | 0.311    |

|                                                            |                       |                      |          |
|------------------------------------------------------------|-----------------------|----------------------|----------|
| Decreased quality of drinking water                        | F (3,152) =<br>5.874  | --                   | 0.001*** |
| No Access to available transport                           | F (3,152) =<br>8.078  | --                   | 0.000*** |
| HH having bicycle (Consider as Negative)                   | F (3,152) =<br>4.953  | --                   | 0.003**  |
| Housing condition or Construction materials of the house   | F (3,152) =<br>2.009  | --                   | 0.115    |
| House affected by cyclone (none to partially to destroyed) | F (3,152) =<br>17.579 | --                   | 0.000*** |
| Not having Cyclone Shelter near to the house               | --                    | $\chi^2(3) = 26.847$ | 0.000*** |
| Unhygienic sanitary latrine                                | F (3,152) =<br>.367   |                      | 0.777    |
| Not having electricity in the house                        | --                    | $\chi^2(3) = 4.9514$ | 0.175    |
| Not having Solar energy as a source of electricity         | --                    | $\chi^2(3) = 48.038$ | 0.000*** |
| <b>Financial Capital</b>                                   |                       |                      |          |
| No membership in the micro-credit organization             | --                    | $\chi^2(3) = 1.437$  | 0.697    |
| Access to micro-finance of NGOs                            | --                    | $\chi^2(3) = 9.675$  | 0.022**  |
| Amount of cash savings (Consider as Negative)              | F (3,152) =<br>7.109  | --                   | 0.000*** |
| Having savings in the bank (Consider as Negative)          | F (3,152) =<br>11.777 | --                   | 0.000*** |
| No Regular inflows of money: Remittance                    | --                    | $\chi^2(3) = 6.944$  | 0.074*   |

\*Significant at  $p \leq 0.10$  \*\* Significant at  $p \leq 0.05$  \*\*\* Significant at  $p \leq .001$ .
